# Supplementary material for: ENO1 Promotes OSCC Migration and Invasion by Orchestrating IL-6 Secretion from Macrophages via a Positive Feedback Loop
Source: MDPI journal article supplement (doi:10.3390/ijms24010737), 2023-01-01

Figure S1. Original Images for Western Blot

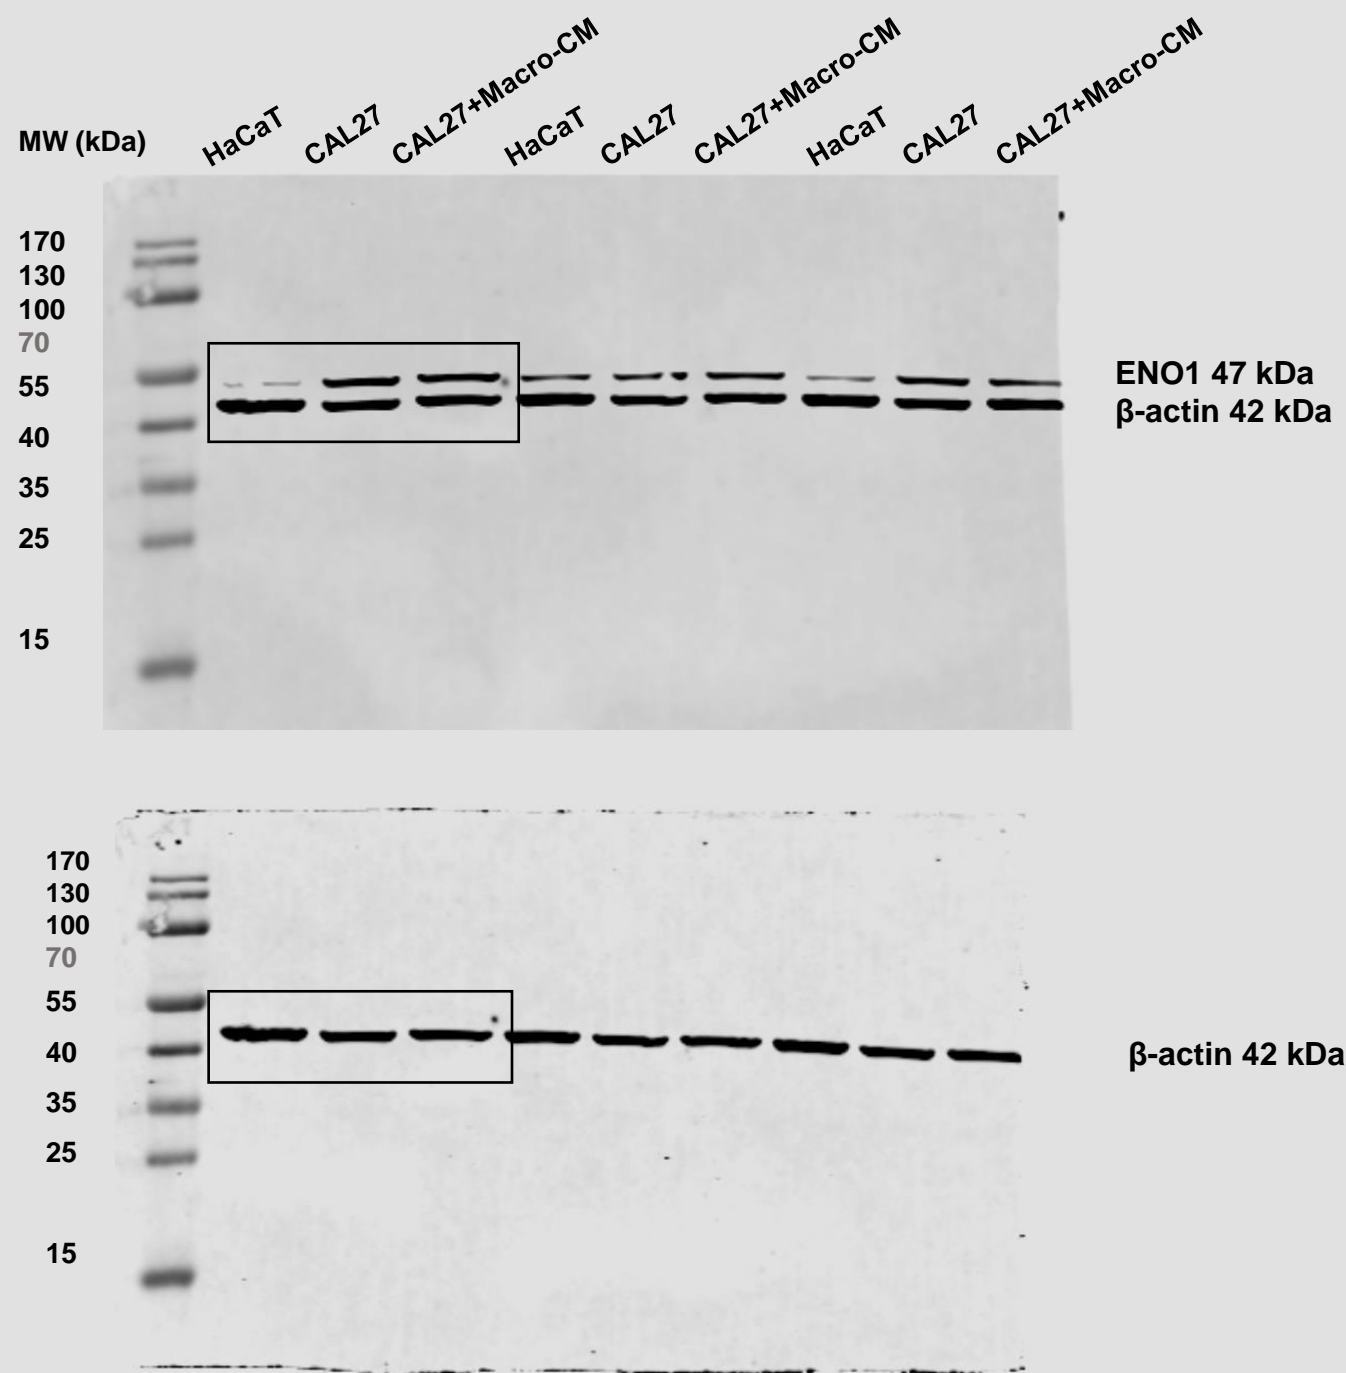

MW (kDa)      Control   Scramble si-ENO1   Control   Scramble si-ENO1

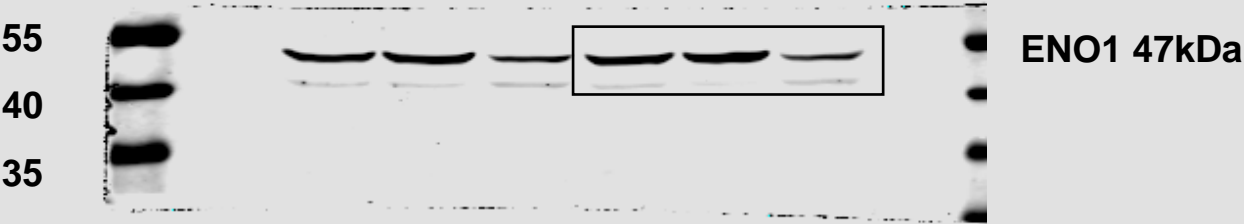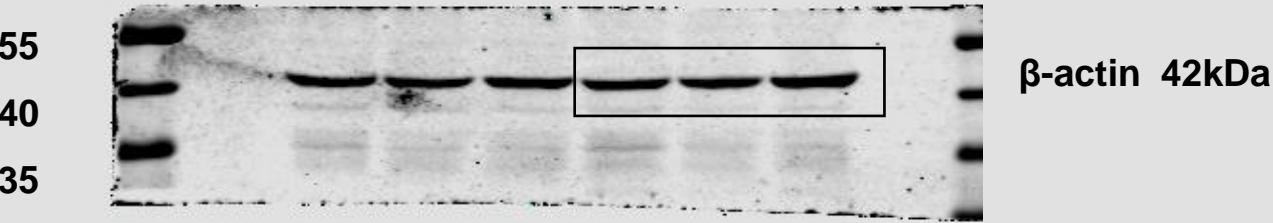

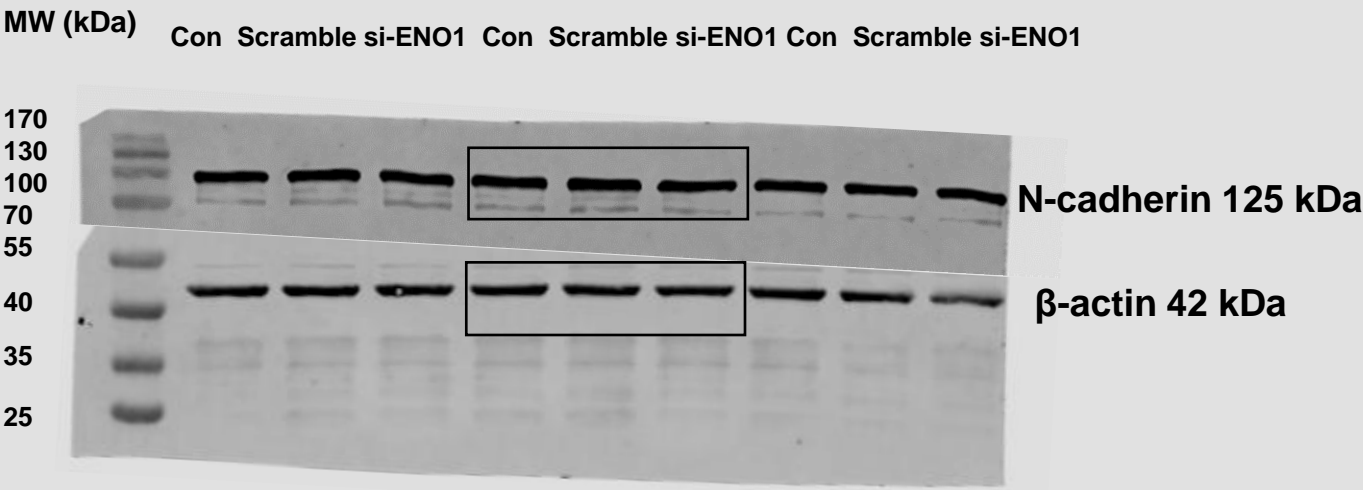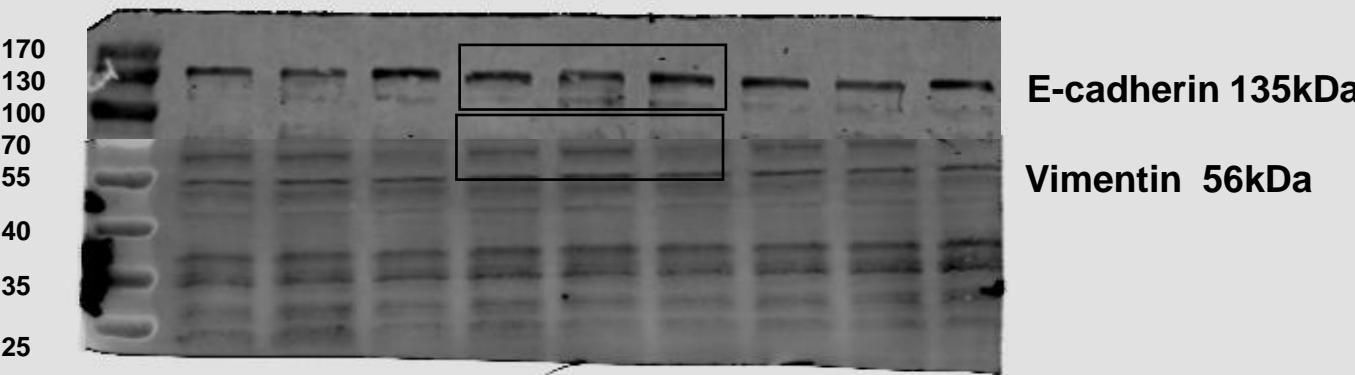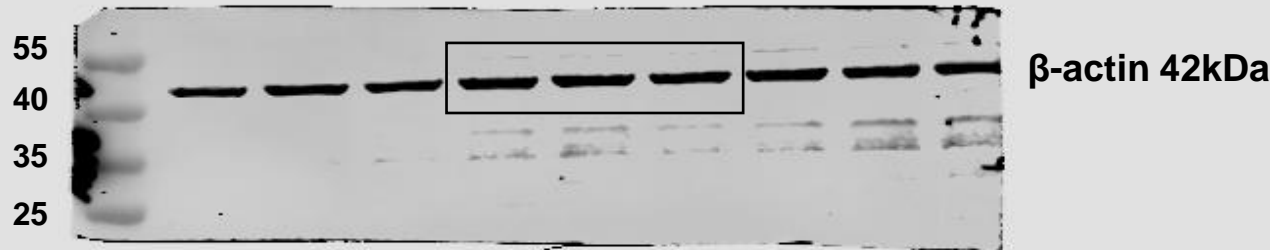

MW (kDa) Control rhENO1 Control rhENO1 Control rhENO1

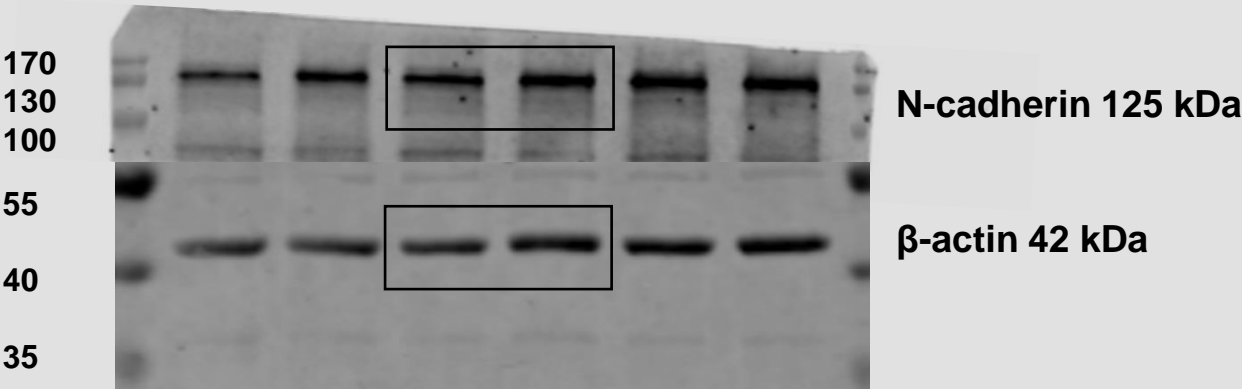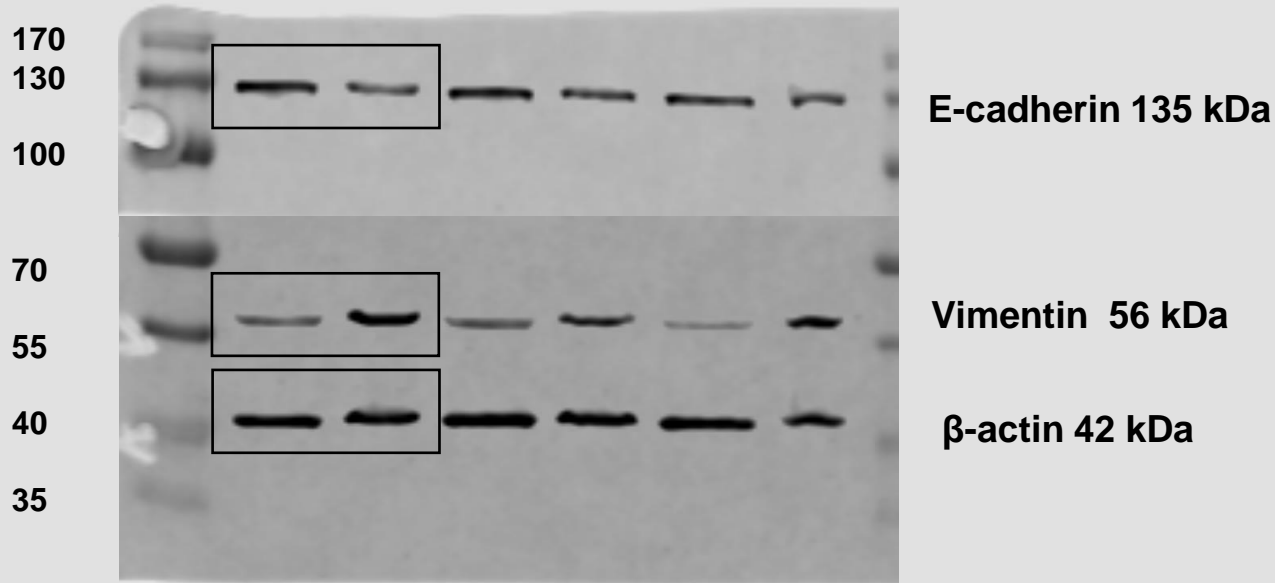

Supplement: s1 [file s1]
