# Supplementary material for: ENO1 Promotes OSCC Migration and Invasion by Orchestrating IL-6 Secretion from Macrophages via a Positive Feedback Loop
Source: MDPI journal article supplement (doi:10.3390/ijms24010737), 2023-01-01
Supplement: s1 [file s1]

## SUPPLEMENTARY TABLES

**Table S1. Target sequences for siRNA**

| siRNA      | Target sequence                           |
|------------|-------------------------------------------|
| NC siRNA   | sense (5'-3') : UUCUCCGAACGUGUCACGUTT     |
|            | antisense (5'-3') : ACGUGACACGUUCGGAGAATT |
| ENO1 siRNA | sense (5'-3') : GCAUUGGAGCAGAGGUUUATT     |
|            | antisense (5'-3') : UAAACCUCUGCUCCAAUGCTT |

**Table S2. Primer sequences for RT-qPCR**

| Gene         | Forward primer 5'-3'     | Reverse primer 5'-3'     |
|--------------|--------------------------|--------------------------|
| <i>ENO1</i>  | GTACCGCCACATCGCTGACTTG   | AGCATGAGAACCGCCATTGATGAC |
| <i>ACTB</i>  | CCTGGCACCCAGCACAAT       | GGGCCGGACTCGTCATAC       |
| <i>Actb</i>  | GTGCTATGTTGCTCTAGACTTCG  | ATGCCACAGGATTCCATACC     |
| <i>Il6</i>   | ACTTCCATCCAGTTGCCTTCTTGG | TTAAGCCTCCGACTTGTGAAGTGG |
| <i>Il10</i>  | CTGCTATGCTGCCTGCTCTTACTG | ATGTGGCTCTGGCCGACTGG     |
| <i>Il12b</i> | CCTGTGACACGCCTGAAGAAGATG | CTTGTGGAGCAGCAGATGTGAGTG |
| <i>Tnfa</i>  | CTCATGCACCACCATCAAGGACTC | AGACAGAGGCAACCTGACCACTC  |
| <i>Tgfb1</i> | GCAACAATTCCTGGCGTTACCTTG | CAGCCACTGCCGTACAACCTCC   |
